# Supplementary material
Source: PubMed Central journal article supplement (PMC2840441)
Supplement: 0912087107_pnas.200912087SI.pdf [file 0912087107_pnas.200912087SI.pdf]

# Supporting Information

Hou et al. 10.1073/pnas.0912087107

**293 cells**

**K562 cells**

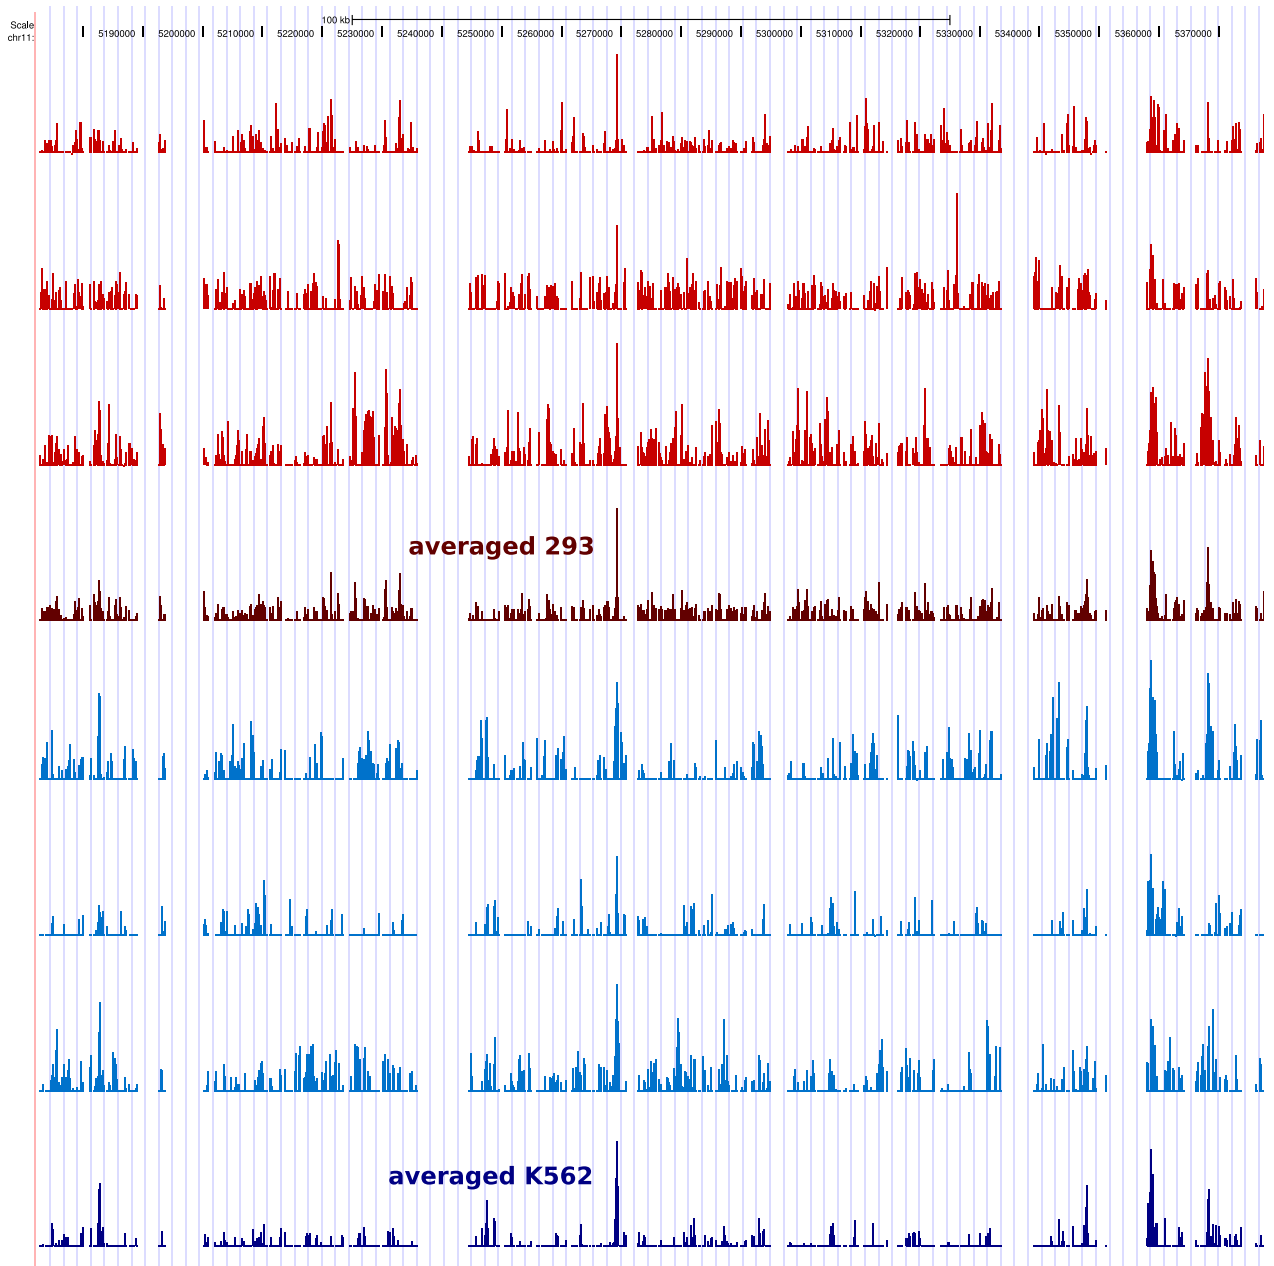

**Fig. S1.** CTCF localization on chr11:5,180,000–5,380,000 in K562 and 293T cells was derived from three independent biological replicates of ChIP-chip experiments. Raw data are shown for 293T cells in red and K562 cells in blue. Averaged data are shown below for each cell type. The averaged data were used to predict CTCF peaks with the ACME algorithm optimized as described in the main text to a training set of sites validated by ChIP.



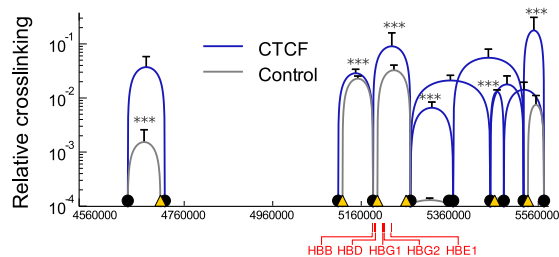

**Fig. S4.** Specificity of CTCF site long-range interactions. 3C was carried out with K562 cell chromatin. Specific interactions between and among CTCF sites (black circles) are depicted by blue curves with the height of the curve corresponding to the cross-linking frequency. A primer for each interacting site was next paired with one from the non-CTCF fragment adjacent to its partner CTCF site (yellow triangles); reduced interaction frequencies (20% or less) between CTCF sites and non-CTCF sites are depicted as gray curves. Cross-linking is plotted relative to the signal for two fragments in the  $\alpha$ -tubulin gene. Note the log scale of the y axis. Error bars represent SD. \*\*\* $P < 0.001$ .

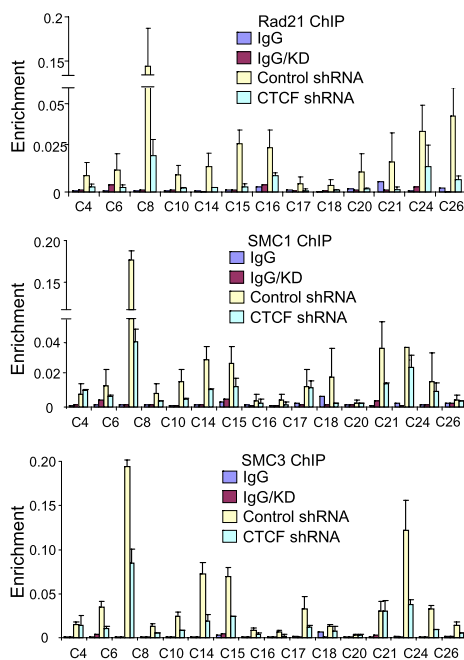

**Fig. S5.** ChIP analysis of cohesin binding after knock-down of CTCF by shRNA. K562 cells were transduced with a control shRNA or an shRNA directed to CTCF. ChIP was performed with antibodies to Rad21, SMC1, or SMC3. The results of three chromatin preparations are shown  $\pm$ SEM.

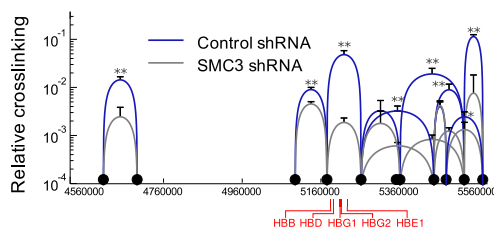

**Fig. S6.** SMC3 knock-down results in loss of CTCF site interactions. The 3C assay was carried out using chromatin from K562 cells transduced with a control shRNA or an shRNA directed to SMC3. Interactions between and among CTCF sites determined by 3C are indicated by blue curves, and reduction of these interactions after knock-down of SMC3 by shRNA is indicated by gray curves. Cross-linking is relative to the signal for two fragments in the  $\alpha$ -tubulin gene. The results of three chromatin preparations are shown  $\pm$ SD. \*\* $P < 0.01$ , \* $P < 0.05$ .



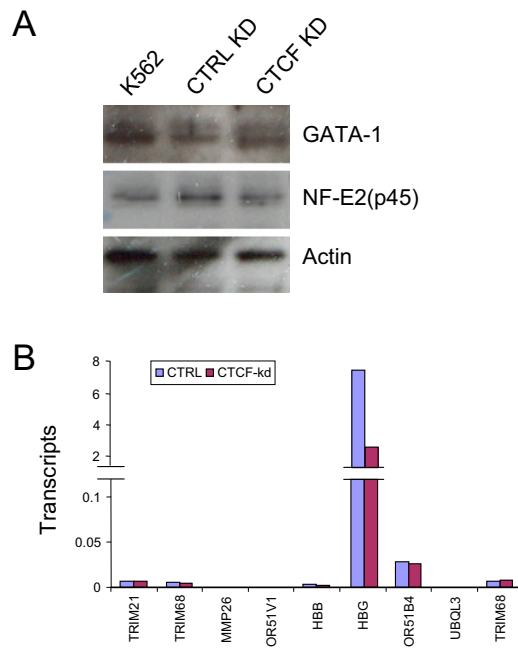

**Fig. 58.** (A) Western blot analysis was carried out with lysates of K562 cells or with cells transduced with a control shRNA or an shRNA directed to CTCF for 4 days. Antibodies to GATA-1 and NF-E2(p45), two important erythroid transactivators, were used. Actin served as the loading control. No obvious change in protein levels was observed. (B) An RT-PCR analysis of selected genes in regions flanking the globin locus was performed after K562 cells were transduced with a control shRNA or an shRNA directed against CTCF. No change in expression of these silent genes was observed after CTCF reduction.

## Other Supporting Information Files

[Table S1 \(DOC\)](#)
